# Supplementary material for: Palladium nanoparticle-decorated multi-layer Ti3C2Tx dual-functioning as a highly sensitive hydrogen gas sensor and hydrogen storage
Source: Royal Society of Chemistry journal article supplement (doi:10.1039/d0ra10879k), 2021-01-01
Supplement: d0ra10879k1.pdf [file d0ra10879k1.pdf]

Supporting Information for

**Palladium Nanoparticles-Decorated Multi-layer  $Ti_3C_2T_x$   
Dual-Functioning as Highly Sensitive Hydrogen Gas Sensor  
and Hydrogen Storage**

Thanh Hoang Phuong Doan,<sup>a</sup> Won G. Hong<sup>b</sup> and Jin-Seo Noh<sup>\*a</sup>

*<sup>a</sup>Department of Physics, Gachon University, 1342 Seongnamdaero, Sujeong-gu, Seongnam-si,  
Gyeonggi-do 13120, Korea*

*<sup>b</sup>Research Center for Materials Analysis, Korea Basic Science Institute (KBSI), Daejeon 34133, Korea*

\*Author to whom correspondence should be addressed: Jin-Seo Noh: e-mail: jinseonoh@gachon.ac.kr,  
phone: +82 317505611

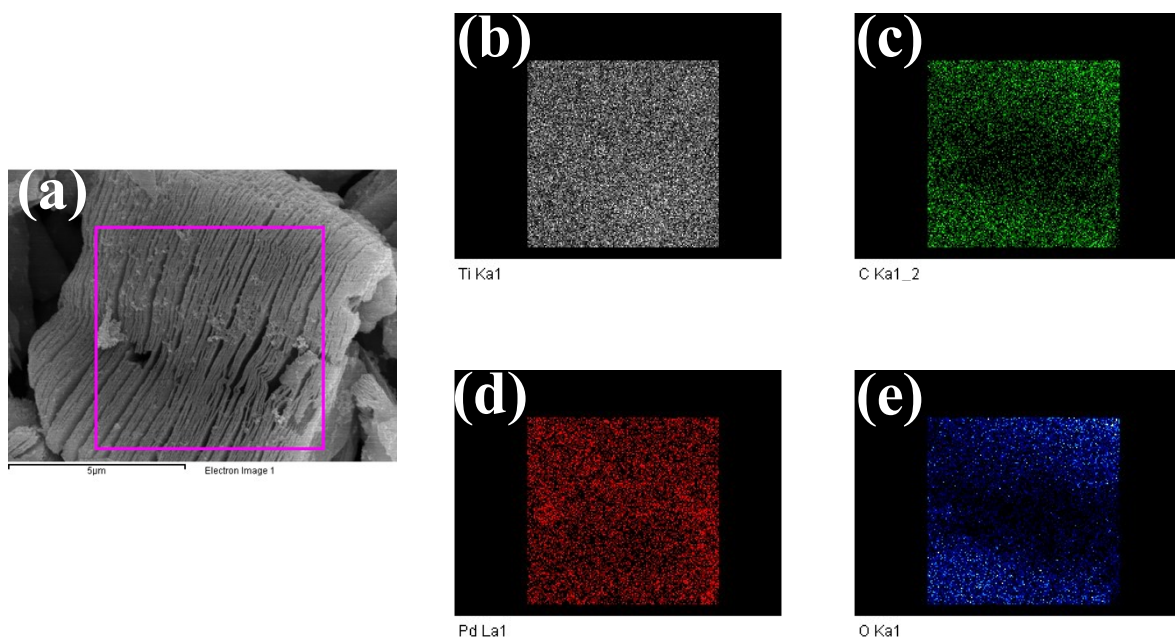

**Figure S1.** (a) SEM image of a Pd-Ti<sub>3</sub>C<sub>2</sub>T<sub>x</sub> nanocomposite (M2). SEM-EDX elemental maps of (b) Ti, (c) C, (d) Pd, and (e) O.

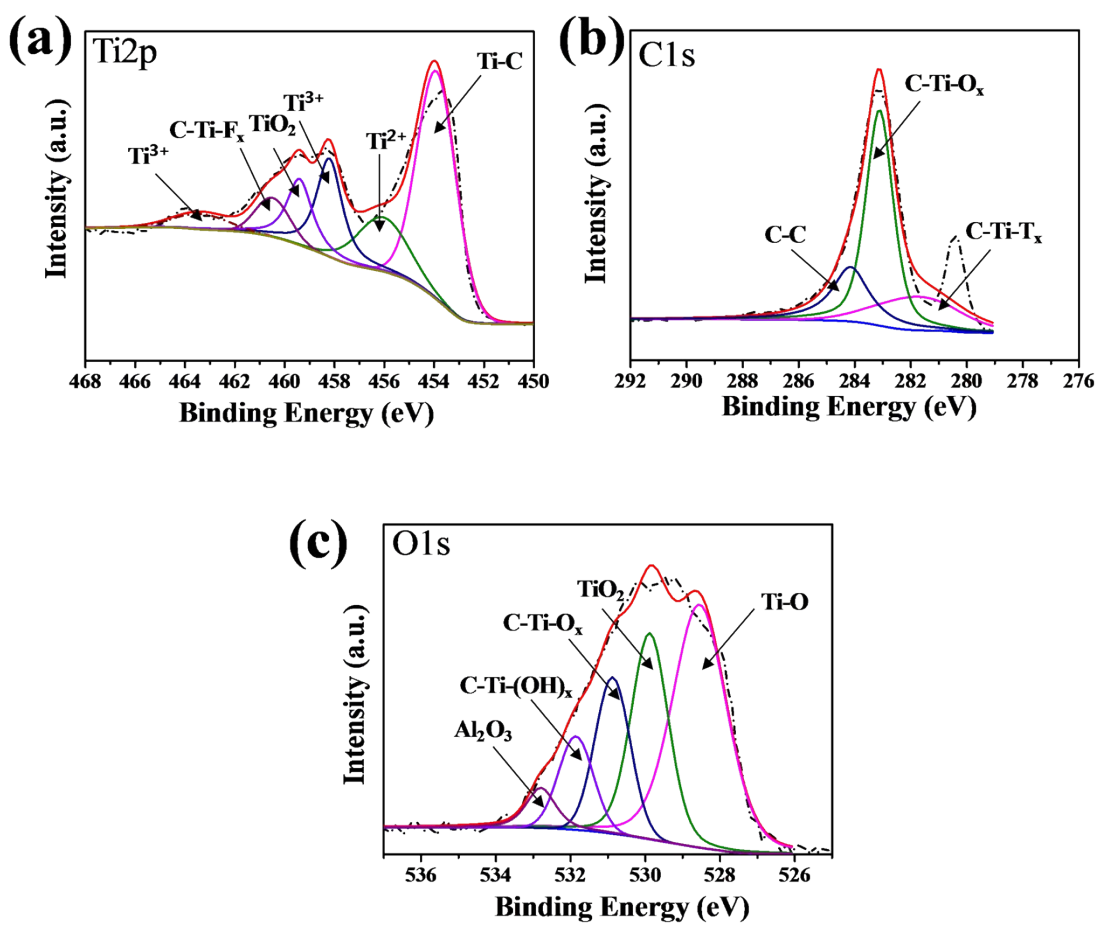

**Figure S2.** XPS spectra of ML- $\text{Ti}_3\text{C}_2\text{T}_x$  focused on (a) Ti, (b) C, and (c) O.

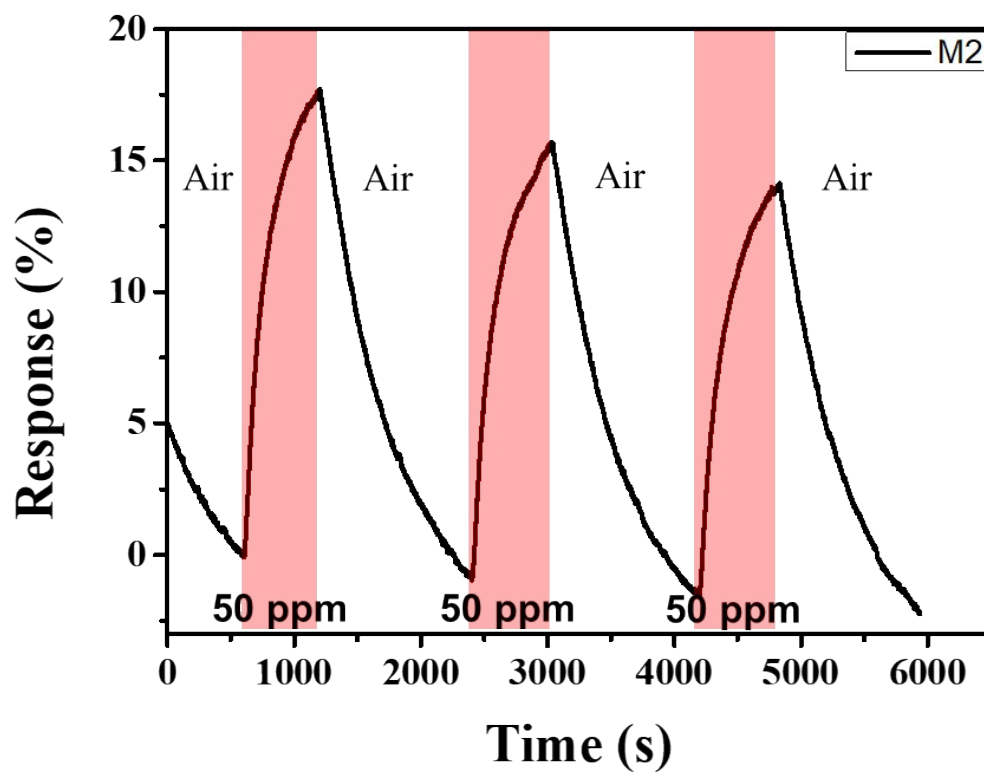

**Figure S3.** Cyclic responses of a Pd-Ti<sub>3</sub>C<sub>2</sub>T<sub>x</sub> nanocomposite (M2) to a 50 ppm of H<sub>2</sub> gas after keeping it for 90 days at ambient condition.
